# Supplementary material for: Fast preparation of controllable nitrogen-atom-substituted graphyne film for use in field effect transistor devices
Source: Royal Society of Chemistry journal article supplement (doi:10.1039/d1qm00736j), 2021-01-01
Supplement: d1qm00736j1.pdf [file d1qm00736j1.pdf]

## Supporting Information for

# Fast Preparation of Controllable Nitrogen Atoms Substituted Graphyne film Applied for FET Devices

Ze Yang,<sup>a</sup> Xin Ren,<sup>b</sup> Xiaodo Ma,<sup>a</sup> Yuwei Song,<sup>a</sup> Xiuli Hu,<sup>a</sup> Mingjia Zhang,<sup>a</sup> Yuan Li,<sup>a</sup> Chipeng Xie,<sup>a</sup>

Xiaodong Li,<sup>a</sup> Jiazhu Li,<sup>b</sup> Changshui Huang<sup>\*a</sup>

<sup>a</sup>Qingdao Institute of Bioenergy and Bioprocess Technology, Chinese Academy of Sciences, Qingdao 266101, PR China.

<sup>b</sup>College of Chemistry and Chemical Engineering, Yantai University, Yantai 264005, China.

\*Corresponding Author: Changshui Huang (email: [huangcs@qibebt.ac.cn](mailto:huangcs@qibebt.ac.cn))

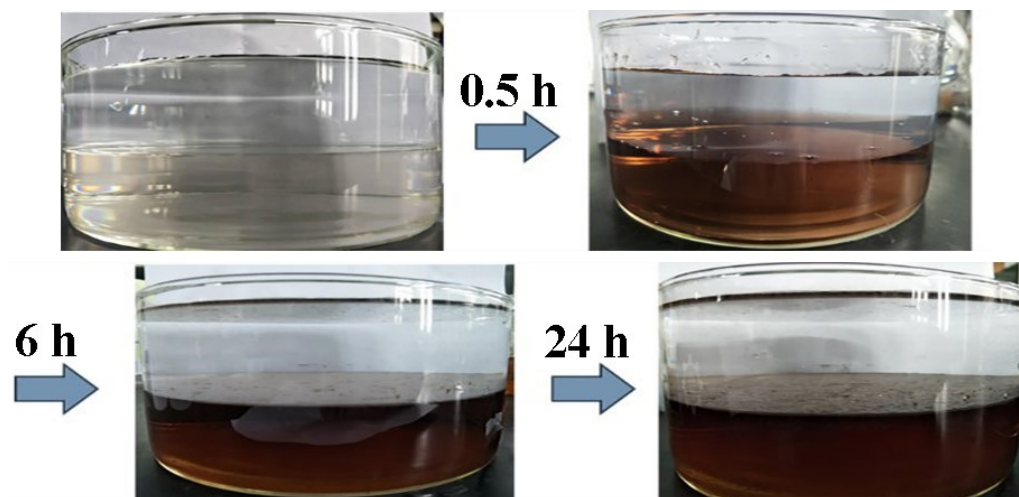

**Fig. S1.** The photographs of the interface at different reaction moments.

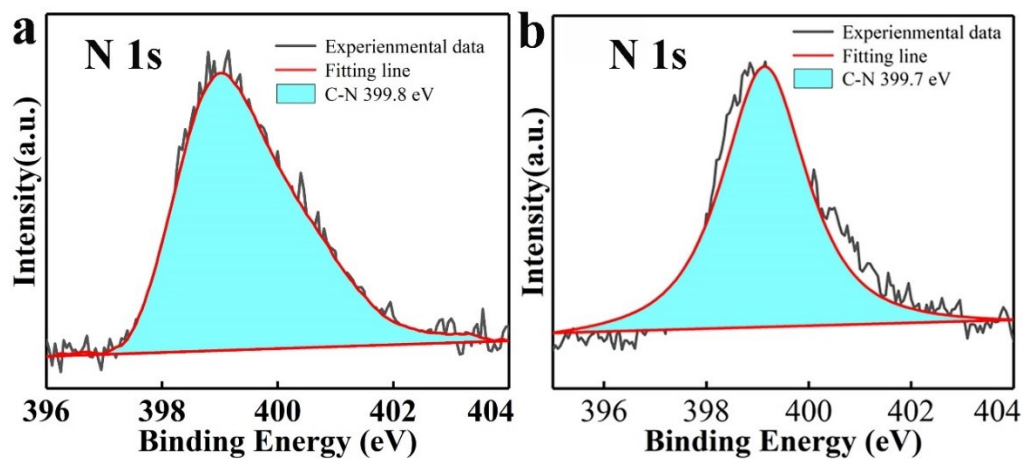

Fig. S2. XPS spectra of PM-GY. Narrow scans for element C (a) and N (b).

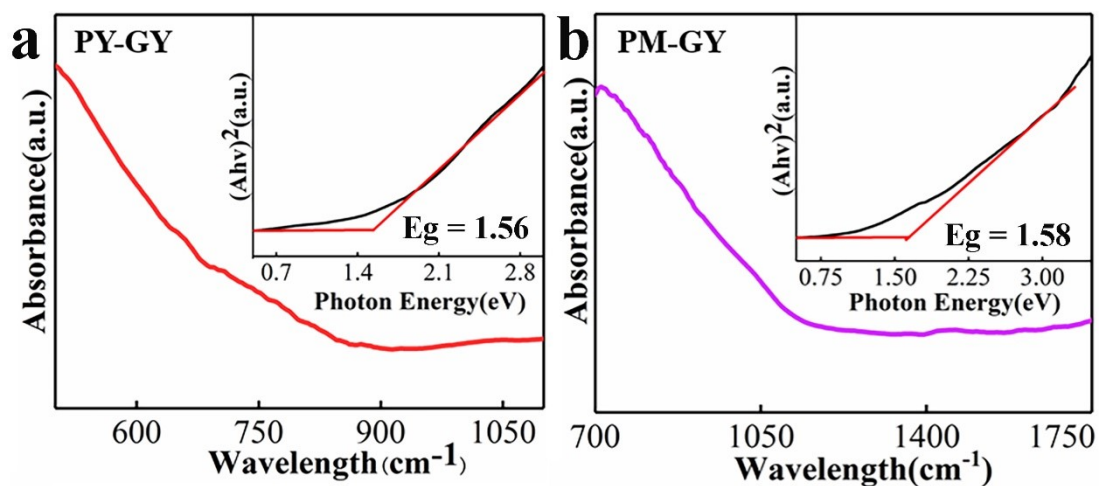

Fig. S3. UV-vis absorption spectrum of PY-GY (a), PM-GY (b).

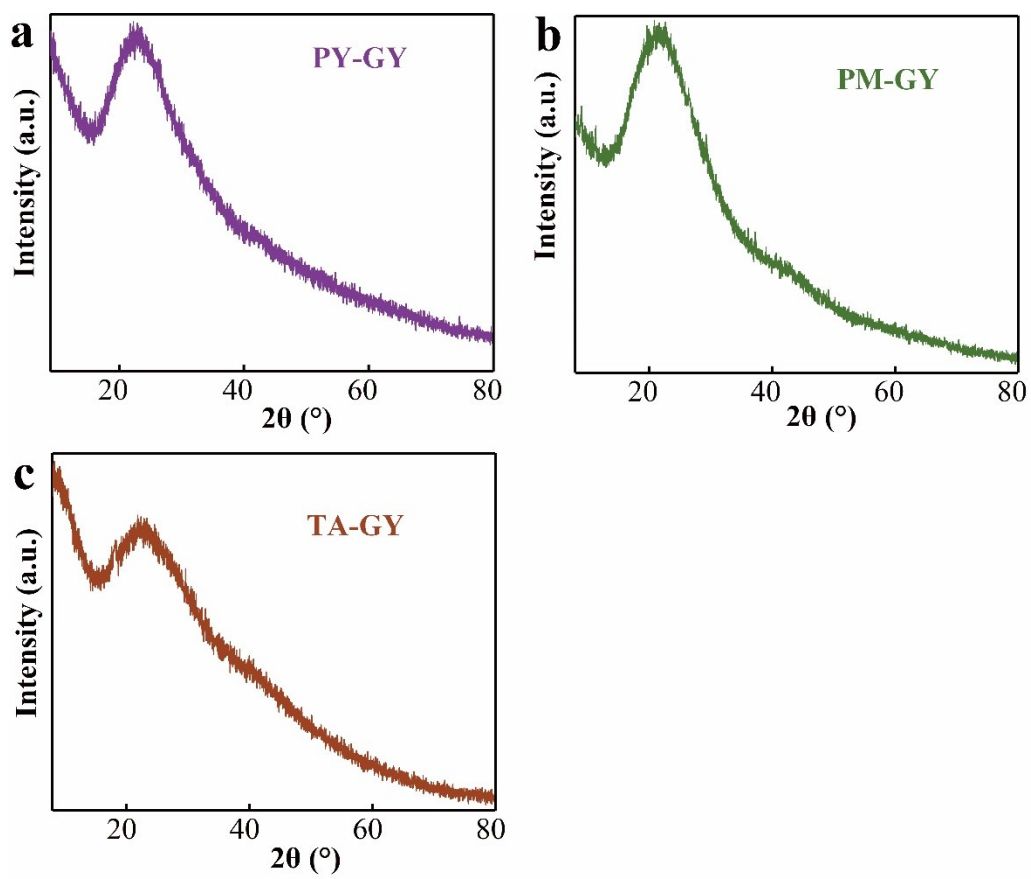

**Fig. S4.** XRD patterns of the as-prepared N-GYs.

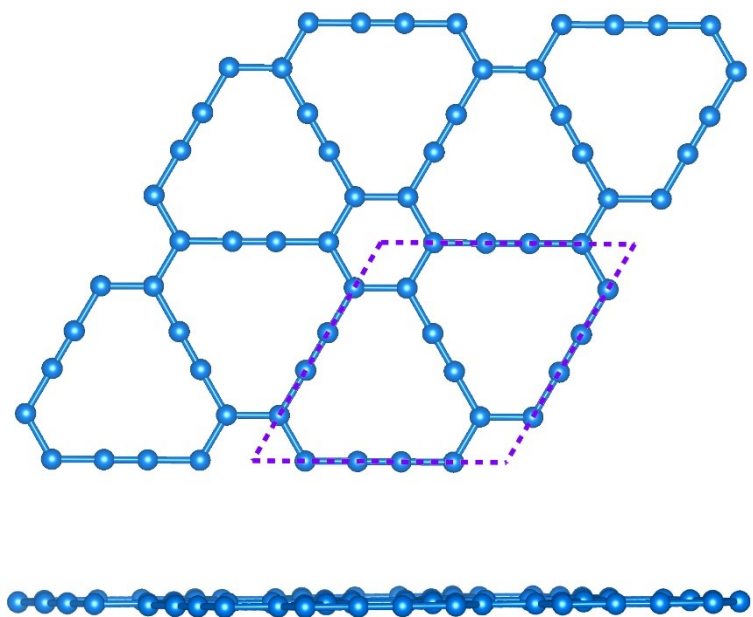

**Fig. S5.** The optimized repeating unit of GY from top and cross-section view.

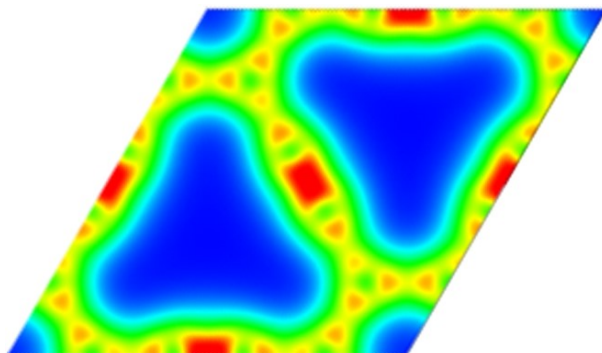

**Fig. S6.** Simulated charge density graphs of GY.

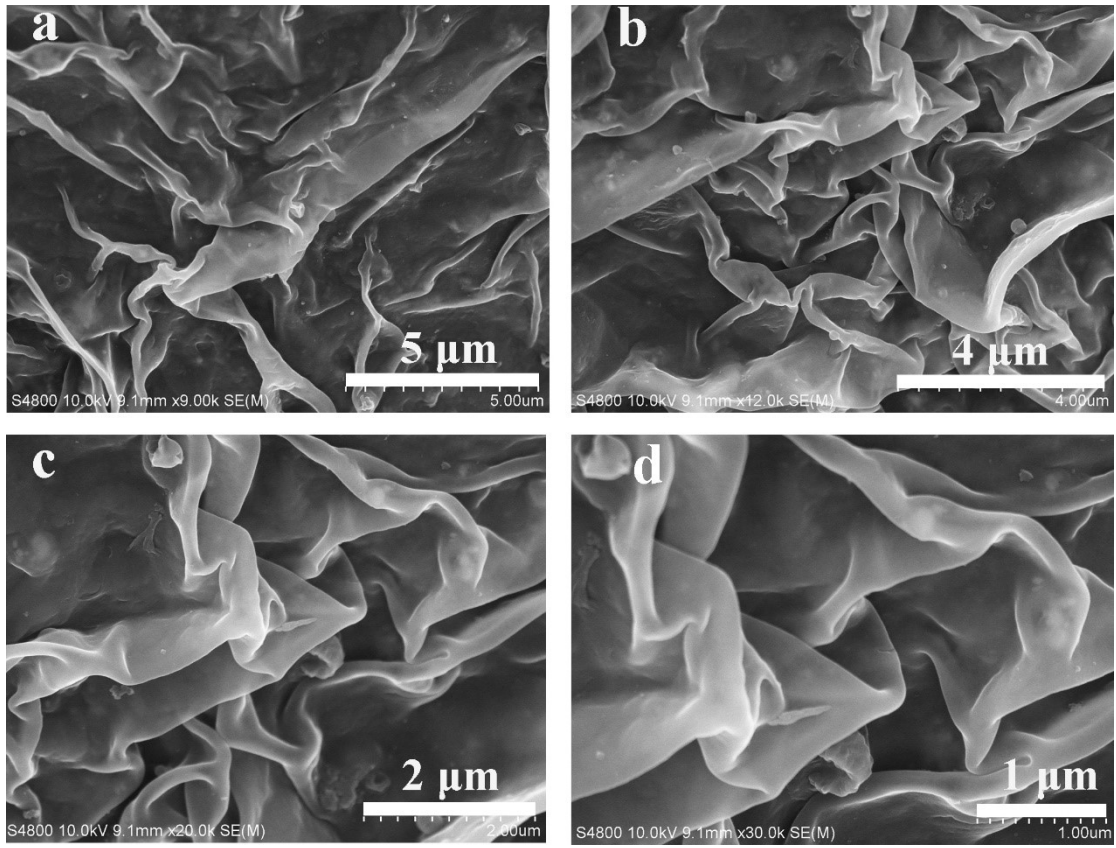

**Fig. S7.** SEM images of HsGY films from top and expanded view.



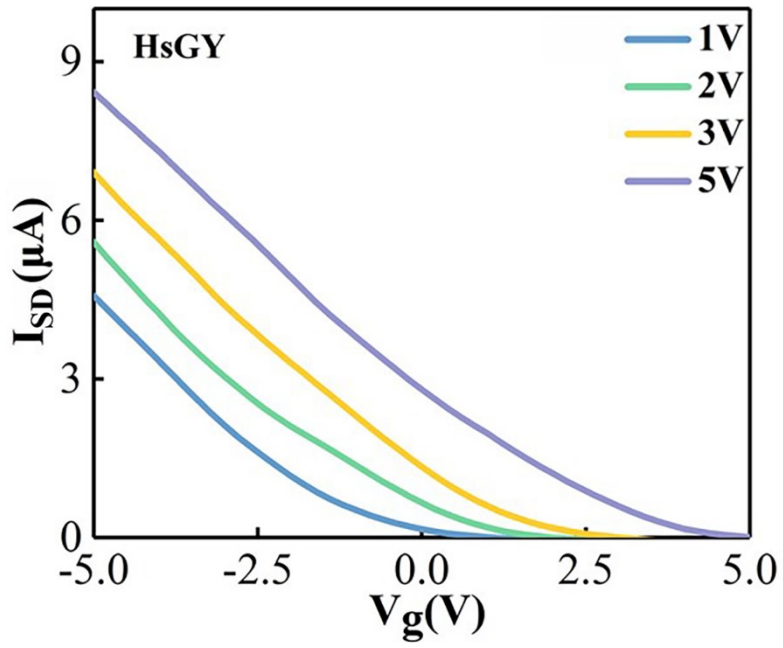

**Fig. S8.** The transfer  $I_{SD}$ - $V_G$  curves for the as-prepared HsGY films.

Table S1. The elemental analysis for C and N in N-GYs.

| Name  | N% (weight) | C% (weight) | C/N (weight) | N/(N+C) (atomic) |
|-------|-------------|-------------|--------------|------------------|
| PY-GY | 11.86       | 82.32       | 6.94         | 0.99/9           |
| PM-GY | 22.90       | 72.18       | 3.15         | 1.92/9           |
| TA-GY | 34.29       | 59.67       | 1.74         | 2.97/9           |

Table S2 Comprehensive comparison of the mobility of carbon materials.

| Carbon materials   | Mobility (cm <sup>2</sup> V <sup>-1</sup> s <sup>-1</sup> ) | Reference         |
|--------------------|-------------------------------------------------------------|-------------------|
| <b>TA-GY</b>       | <b>9.8</b>                                                  | <b>This work</b>  |
| GDY/PFC            | 0.69                                                        | Ref. <sup>1</sup> |
| C-N-PDTs           | 1.8                                                         | Ref. <sup>2</sup> |
| GNRs               | 0.41                                                        | Ref. <sup>3</sup> |
| Es-PG <sub>4</sub> | 1.82                                                        | Ref. <sup>4</sup> |
| CNT                | 5                                                           | Ref. <sup>5</sup> |
| GDY/HBN            | 6.3                                                         | Ref. <sup>6</sup> |
| r-GO               | 6.3                                                         | Ref. <sup>7</sup> |
| SWNTS              | 6.68                                                        | Ref. <sup>8</sup> |
| B-CNTS             | 7.2                                                         | Ref. <sup>9</sup> |

GDY, Graphdiyne; PFC, P-o-FBDTP-C8DTBTff, HBN, Hexagonal boron nitride; C-N-PDTs, 2,9-Dialkylated phenanthro [1,2-b:8,7-b'] dithiophene derivatives; GNRs, Graphenenanoribbons; Es-PG<sub>4</sub>, Electrospun nanofiber; CNT, Carbon nanotubes; B-CNT, Boron-doped carbon nanotubes; r-GO: Reduced graphene oxide; SWNTS, Semiconducting single-walled carbon nanotubes.

## References

1. W. Cui, M. Zhang, N. Wang, J. He, J. Yu, Y. Long, S. Yan and C. Huang, High-Performance Field-Effect Transistor Based on Novel Conjugated P-o-Fluoro-p-alkoxyphenyl-Substituted Polymers by Graphdiyne Doping. *J. Phys. Chem. C*, 2017, **121**, 23300-23306.
2. Y. Kubozono, K. Hyodo, H. Mori, S. Hamao, H. Goto and Y. Nishihara, Transistor application of new picene-type molecules, 2,9-dialkylated phenanthro 1,2-b:8,7-b' dithiophenes. *J. Mater. Chem. C*, 2015, **3**, 2413-2421.
3. J. Ma, H. Zhu, W. Huang, T. Lin, X. Pan and W. Wang, Graphene Nanoribbons from Tetraphenylethene-Based Polymeric Precursor: Chemical Synthesis and Application in Thin-Film Field-Effect Transistor. *Chin. J. Chem.*, 2015, **33**, 1380-1388.
4. C.-J. Lin, C.-L. Liu and W.-C. Chen, Poly(3-hexylthiophene)-graphene composite-based aligned nanofibers for high-performance field effect transistors. *J. Mater. Chem. C*, 2015, **3**, 4290-4296.
5. M.-Y. Wu, J. Wang and M. S. Arnold, Channel length scaling of over 100% biaxially stretchable carbon nanotube transistors. *Appl. Phys. Lett.*, 2019, **114**, 143301.
6. J. Zhou, Z. Xie, R. Liu, X. Gao, J. Li, Y. Xiong, L. Tong, J. Zhang and Z. Liu, Synthesis of Ultrathin Graphdiyne Film Using a Surface Template. *ACS Appl. Mater. Interfaces*, 2019, **11**, 2632-2637.
7. M. Hasegawa, Y. Hirayama, Y. Ohno, K. Maehashi and K. Matsumoto, Characterization of reduced graphene oxide field-effect transistor and its application to biosensor. *Jpn. J. Appl. Phys.*, 2014, **53**, 05FD05.
8. S. Mesgari, A. K. Sundramoorthy, L. S. Loo and M. B. Chan-Park, Gel electrophoresis using a selective radical for the separation of single-walled carbon nanotubes. *Faraday Discuss.*, 2014, **173**, 351-363.
9. K. Yu, J. M. Lee, J. Kim, G. Kim, H. Kang, B. Park, Y. Ho Kahng, S. Kwon, S. Lee, B. H. Lee, J. Kim, H. I. Park, S. O. Kim and K. Lee, Semiconducting polymers with nanocrystallites interconnected via boron-doped carbon nanotubes. *Nano Lett*, 2014, **14**, 7100-7106.
